# Supplementary material
Source: PubMed Central journal article supplement (PMC4455263)
Supplement: JB.00220-15_zjb999093649so1.pdf [file JB.00220-15_zjb999093649so1.pdf]

1 **Table S1: Bacterial Strains & Vectors**

| Strain                                     | Description                                                                                                                                                                                                                   | Source/Reference             |
|--------------------------------------------|-------------------------------------------------------------------------------------------------------------------------------------------------------------------------------------------------------------------------------|------------------------------|
| <b><i>E. coli</i> strains</b>              |                                                                                                                                                                                                                               |                              |
| DH5 $\alpha$                               | F-, $\phi$ 80lacZ, M15, $\Delta$ ( <i>lacZYA-argF</i> ), U169, <i>recA1</i> , <i>endA1</i> , <i>hsdR17</i> ( <i>rk-</i> , <i>mk+</i> ), <i>phoA</i> <i>supE44</i> , <i>thi-1</i> , <i>gyrA96</i> , <i>relA1</i> , $\lambda$ - | Invitrogen                   |
| BTH101                                     | F-, <i>cya-99</i> , <i>araD139</i> , <i>galE15</i> , <i>galK16</i> , <i>rpsL1</i> ( <i>StrR</i> ), <i>hsdR2</i> , <i>mcrA1</i> , <i>mcrB1</i> , <i>relA1</i>                                                                  | Euromedex                    |
| SM10                                       | <i>thi-1</i> , <i>thr</i> , <i>leu</i> , <i>tonA</i> , <i>lacy</i> , <i>supE</i> , <i>recA</i> , RP4-2-Tcr:: <i>Mu</i> , Km <sup>r</sup> ; mobilizes plasmids into <i>P. aeruginosa</i> via conjugation                       | Simon, et al. (1)            |
| <b><i>P. aeruginosa</i> strains</b>        |                                                                                                                                                                                                                               |                              |
| PAK                                        | Wild-type                                                                                                                                                                                                                     | J. Boyd                      |
| $\Delta$ <i>pilM</i>                       | Deletion of <i>pilM</i>                                                                                                                                                                                                       | M. Ayers, et al. (2)         |
| <i>pilN</i> ::FRT                          | FRT scar at position 124 within <i>pilN</i>                                                                                                                                                                                   | M. Ayers, et al. (2)         |
| <i>pilO</i> ::FRT                          | FRT scar at position 328 within <i>pilO</i>                                                                                                                                                                                   | M. Ayers, et al. (2)         |
| <i>pilP</i> ::FRT                          | FRT scar at position 86 within <i>pilP</i>                                                                                                                                                                                    | M. Ayers, et al. (2)         |
| <i>pilT</i> ::FRT                          | FRT scar at position 540 within <i>pilT</i>                                                                                                                                                                                   | C. B. Whitchurch, et al. (3) |
| <i>pilN</i> ::FRT/ <i>pilT</i> ::FRT       | FRT scar at position 124 within <i>pilN</i> and FRT scar at position 540 within <i>pilT</i>                                                                                                                                   | H. Takhar, et al.(4)         |
| <i>pilA</i> ::FRT                          | FRT scar at SphI site within <i>pilA</i>                                                                                                                                                                                      | J. V. Kus, et al. (5)        |
| <i>pilN</i> ES132-133VA                    | <i>pilN</i> ES132-133VA                                                                                                                                                                                                       | This study                   |
| <i>pilN</i> ES132-133VA/ <i>pilT</i> ::FRT | <i>pilN</i> ES132-133VA with FRT scar at position 540 within <i>pilT</i>                                                                                                                                                      | This study                   |
| <i>pilN</i> MR141-142KL                    | <i>pilN</i> MR141-142KL                                                                                                                                                                                                       | This study                   |
| <i>pilN</i> MR141-142KL/ <i>pilT</i> ::FRT | <i>pilN</i> MR141-142KL with FRT scar at position 540 within <i>pilT</i>                                                                                                                                                      | This study                   |
| <i>pilN</i> M141K                          | <i>pilN</i> M141K single mutation of <i>pilN</i> MR141-142KL                                                                                                                                                                  | This study                   |
| <i>pilN</i> R142L                          | <i>pilN</i> R142L single mutation of <i>pilN</i> MR141-142KL                                                                                                                                                                  | This study                   |

|                                             |                                                                                   |                         |
|---------------------------------------------|-----------------------------------------------------------------------------------|-------------------------|
| <i>pilN</i> EV157-158AD                     | <i>pilN</i> EV157-158AD                                                           | This study              |
| <i>pilN</i> EV157-158AD / <i>pilT</i> ::FRT | <i>pilN</i> EV157-158AD with FRT scar at position 540 within <i>pilT</i>          | This study              |
| <i>pilN</i> E157A                           | <i>pilN</i> E157A single mutation of <i>pilN</i> EV157-158AD                      | This study              |
| <i>pilN</i> V158D                           | <i>pilN</i> V158D single mutation of <i>pilN</i> EV157-158AD                      | This study              |
| <i>pilN</i> Triple                          | Triple mutation <i>pilN</i> ESMREV132-133-141-142-157-158VAKLAD                   | This study              |
| <i>pilN</i> L81K                            | <i>pilN</i> L81K                                                                  | This study              |
| <i>pilN</i> L81A                            | <i>pilN</i> L81A                                                                  | This study              |
| <i>pilN</i> L82K                            | <i>pilN</i> L82K                                                                  | This study              |
| <i>pilN</i> LD64-65KK                       | <i>pilN</i> LD64-65KK                                                             | This study              |
| <i>pilN</i> L64K                            | <i>pilN</i> L64K single mutation of <i>pilN</i> LD64-65KK                         | This study              |
| <i>pilN</i> D65K                            | <i>pilN</i> D65K single mutation of <i>pilN</i> LD64-65KK                         | This study              |
| <i>pilN</i> chimera                         | <i>pilN</i> chimera – residues 23-45 replaced with <i>pilO</i> residues 21-43     | This study              |
| <i>pilO</i> M92A                            | <i>pilO</i> M92A                                                                  | This study              |
| <i>pilO</i> M92K                            | <i>pilO</i> M92K                                                                  | This study              |
| <i>pilO</i> chimera                         | <i>pilO</i> chimera – residues 21-43 replaced with <i>pilN</i> residues 23-45     | This study              |
| <b>Vectors</b>                              | <b>Description</b>                                                                | <b>Source/Reference</b> |
| pEX18Gm                                     | Suicide vector used for gene replacement, Gm <sup>R</sup>                         | T. T. Hoang, et al. (6) |
| pFLP2                                       | 2.6-kb BamHI–SphI fragment from pALB2 ligated into the SmaI site, Ap <sup>R</sup> | T. T. Hoang, et al. (6) |
| pKT25                                       | Kn <sup>R</sup>                                                                   | G. Karimova, et al. (7) |
| pUT18C                                      | Ap <sup>R</sup>                                                                   | G. Karimova, et al. (7) |

|                                                   |                                                                                                 |            |
|---------------------------------------------------|-------------------------------------------------------------------------------------------------|------------|
| pUT18C:: <i>pilN</i> Δ44                          | Ap <sup>R</sup>                                                                                 | Howell Lab |
| pKT25:: <i>pilN</i> Δ44                           | Kn <sup>R</sup>                                                                                 | Howell Lab |
| pUT18C:: <i>pilO</i> Δ51                          | Ap <sup>R</sup>                                                                                 | Howell Lab |
| pKT25:: <i>pilO</i> Δ51                           | Kn <sup>R</sup>                                                                                 | Howell Lab |
| pUT18C:: <i>pilN</i>                              | Ap <sup>R</sup>                                                                                 | This study |
| pKT25:: <i>pilN</i>                               | Kn <sup>R</sup>                                                                                 | This study |
| pUT18C:: <i>pilO</i>                              | Ap <sup>R</sup>                                                                                 | This study |
| pKT25:: <i>pilO</i>                               | Kn <sup>R</sup>                                                                                 | This study |
| pUT18C:: <i>pilN</i> ES132-133VA                  | <i>pilN</i> ES132-133VA, Ap <sup>R</sup>                                                        | This study |
| pUT18C:: <i>pilN</i> MR141-142KL                  | <i>pilN</i> MR141-142KL, Ap <sup>R</sup>                                                        | This study |
| pUT18C:: <i>pilN</i> EV157-158AD                  | <i>pilN</i> EV157-158AD, Ap <sup>R</sup>                                                        | This study |
| pUT18C:: <i>pilN</i> Triple                       | <i>pilN</i> ESMREV132-133-141-142-157-158VAKLAD, Ap <sup>R</sup>                                | This study |
| pUT18C:: <i>pilN</i> L81K                         | <i>pilN</i> L81K, Ap <sup>R</sup>                                                               | This study |
| pUT18C:: <i>pilN</i> L81A                         | <i>pilN</i> L81A, Ap <sup>R</sup>                                                               | This study |
| pUT18C:: <i>pilN</i> L82K                         | <i>pilN</i> L82K, Ap <sup>R</sup>                                                               | This study |
| pUT18C:: <i>pilN</i> LD64-65KK                    | <i>pilN</i> LD64-65KK, Ap <sup>R</sup>                                                          | This study |
| pUT18C:: <i>pilN</i> chimera                      | <i>pilN</i> chimera – residues 23-45 replaced with <i>pilO</i> residues 21-43 , Ap <sup>R</sup> | This study |
| pKT25:: <i>pilO</i> M92A                          | <i>pilO</i> M92A, Kn <sup>R</sup>                                                               | This study |
| pKT25:: <i>pilO</i> M92K                          | <i>pilO</i> M92K, Kn <sup>R</sup>                                                               | This study |
| pKT25:: <i>pilO</i> chimera                       | <i>pilO</i> chimera – residues 21-43 replaced with <i>pilN</i> residues 23-45 , Kn <sup>R</sup> | This study |
| pKT25:: <i>pilM</i>                               | Kn <sup>R</sup>                                                                                 | This study |
| pEX18Gm:: <i>pilMNO</i> - <i>pilN</i> ES132-133VA | Suicide vector containing PAK <i>pilMNO</i> with <i>pilN</i> ES132-133VA, Gm <sup>R</sup>       | This study |
| pEX18Gm:: <i>pilMNO</i> - <i>pilN</i> MR141-142KL | Suicide vector containing PAK <i>pilMNO</i> with <i>pilN</i> MR141-142KL, Gm <sup>R</sup>       | This study |

|                                                   |                                                                                                                                                 |            |
|---------------------------------------------------|-------------------------------------------------------------------------------------------------------------------------------------------------|------------|
| pEX18Gm:: <i>pilMNO</i> - <i>pilN</i> M141K       | Suicide vector containing PAK <i>pilMNO</i> with <i>pilN</i> M141K single mutation of <i>pilN</i> MR141-142KL, Gm <sup>R</sup>                  | This study |
| pEX18Gm:: <i>pilMNO</i> - <i>pilN</i> R142L       | Suicide vector containing PAK <i>pilMNO</i> with <i>pilN</i> R142L single mutation of <i>pilN</i> MR141-142KL, Gm <sup>R</sup>                  | This study |
| pEX18Gm:: <i>pilMNO</i> - <i>pilN</i> EV157-158AD | Suicide vector containing PAK <i>pilMNO</i> with <i>pilN</i> EV157-158AD, Gm <sup>R</sup>                                                       | This study |
| pEX18Gm:: <i>pilMNO</i> - <i>pilN</i> E157A       | Suicide vector containing PAK <i>pilMNO</i> with <i>pilN</i> E157A single mutation of <i>pilN</i> EV157-158AD, Gm <sup>R</sup>                  | This study |
| pEX18Gm:: <i>pilMNO</i> - <i>pilN</i> V158D       | Suicide vector containing PAK <i>pilMNO</i> with <i>pilN</i> V158D single mutation of <i>pilN</i> EV157-158AD, Gm <sup>R</sup>                  | This study |
| pEX18Gm:: <i>pilMNO</i> - <i>pilN</i> Triple      | Suicide vector containing PAK <i>pilMNO</i> with <i>pilN</i> ESMREV132-133-141-142-157-158VAKLAD, Gm <sup>R</sup>                               | This study |
| pEX18Gm:: <i>pilMNO</i> - <i>pilN</i> L81K        | Suicide vector containing PAK <i>pilMNO</i> with <i>pilN</i> L81K, Gm <sup>R</sup>                                                              | This study |
| pEX18Gm:: <i>pilMNO</i> - <i>pilN</i> L81A        | Suicide vector containing PAK <i>pilMNO</i> with <i>pilN</i> L81A, Gm <sup>R</sup>                                                              | This study |
| pEX18Gm:: <i>pilMNO</i> - <i>pilN</i> L82K        | Suicide vector containing PAK <i>pilMNO</i> with <i>pilN</i> L82K, Gm <sup>R</sup>                                                              | This study |
| pEX18Gm:: <i>pilMNO</i> - <i>pilN</i> LD64-65KK   | Suicide vector containing PAK <i>pilMNO</i> with <i>pilN</i> LD64-65KK, Gm <sup>R</sup>                                                         | This study |
| pEX18Gm:: <i>pilMNO</i> - <i>pilN</i> L64K        | Suicide vector containing PAK <i>pilMNO</i> with <i>pilN</i> L64K single mutation of <i>pilN</i> LD64-65KK, Gm <sup>R</sup>                     | This study |
| pEX18Gm:: <i>pilMNO</i> - <i>pilN</i> D65K        | Suicide vector containing PAK <i>pilMNO</i> with <i>pilN</i> D65K single mutation of <i>pilN</i> LD64-65KK, Gm <sup>R</sup>                     | This study |
| pEX18Gm:: <i>pilMNO</i> - <i>pilN</i> chimera     | Suicide vector containing PAK <i>pilMNO</i> with <i>pilN</i> chimera - residues 23-45 replaced with <i>pilO</i> residues 21-43, Gm <sup>R</sup> | This study |
| pEX18Gm:: <i>pilNOP</i> - <i>pilO</i> M92A        | Suicide vector containing PAK <i>pilNOP</i> with <i>pilO</i> M92A, Gm <sup>R</sup>                                                              | This study |
| pEX18Gm:: <i>pilNOP</i> - <i>pilO</i> M92K        | Suicide vector containing PAK <i>pilNOP</i> with <i>pilO</i> M92K, Gm <sup>R</sup>                                                              | This study |

|                                               |                                                                                                                                                 |                          |
|-----------------------------------------------|-------------------------------------------------------------------------------------------------------------------------------------------------|--------------------------|
| pEX18Gm:: <i>pilNOP</i> - <i>pilO</i> chimera | Suicide vector containing PAK <i>pilNOP</i> with <i>pilO</i> chimera - residues 21-43 replaced with <i>pilN</i> residues 23-45, Gm <sup>R</sup> | This study               |
| pEX18Ap:: <i>pilT</i> ::Gm:: <i>FRT</i>       | Suicide vector containing <i>pilT</i> disrupted with FRT-flanked gentamicin cassette at position 540, Ap <sup>R</sup> and Gm <sup>R</sup>       | M. L. Asikyan et al. (8) |

2

3

4 **Table S2: Oligonucleotide Primer Sequences**

| Name               | Oligonucleotide Sequence (5' – 3')                    |
|--------------------|-------------------------------------------------------|
| PilOΔ51F           | TATATAACTCTAGAGATGAGTGACATGCAGGCTCAGCTCGAAC           |
| PilOΔ51R           | TATATATAGAATTCTTCATTTCTTCAGCCCCTTGTCGTTGTAGC          |
| PilNΔ44F           | TATATAACTCTAGAGATGGCGGCCATCGAGAAC                     |
| PilNΔ44R           | TATATATAGAATTCTTCATTTCTTGGCTCCTTGCGC                  |
| Bth PilOF          | TATATAACTCTAGAGATGAGTCTGGCCAGTTCCTGGAAAGTC            |
| Bth PilOR          | TATATATAGAATTCTTCATTTCTTCAGCCCCTTGTCGTTGTAGC          |
| Bth PilNF          | TATATAACTCTAGAGATGGCACGGATCAACCTTCTACCCTGG            |
| Bth PilNR          | TATATATGGAATTCGTCATTTCTTGGCTCCTTGCGCAACCCC            |
| Bth PilMF          | TAT ATA TAT CTA GAG GTG CTA GGG CTC ATA AAG AAG AAA G |
| Bth PilMR          | TAT TAT AAG AAT TCG TCA GTC GAA ACT CCT CAA CGC C     |
| PilN ES132-133VA F | CCGGCGCGGCCGTGGCCAACAACCGCGTTTCC                      |
| PilN ES132-133VA R | GGAAACGCGGTTGTTGGCCACGGCCGCGCCGG                      |
| PilN MR141-142KL F | CCGCGTTTCCAATCTCAAGCTCAACATGGACGCGTCCGAGTGCC          |
| PilN MR141-142KL R | GCCACTCGGACGCGTCCATGTTGAGCTTGAGATTGGAAACGCGG          |
| PilN M141K F       | CGCGTTTCCAATCTCAAGCGCAACATGGACGCG                     |
| PilN M141K R       | CGCGTCCATGTTGCGCTTGAGATTGGAAACGCG                     |
| PilN R142L F       | CGGTTTCCAATCTCATGCTCAACATGGACGCGGTCCG                 |
| PilN R142L R       | CGGACCGCGTCCATGTTGAGCATGAGATTGGAAACCG                 |
| PilN EV157-158AD F | CCGCCCCGACCCTGAACGCGGACAAGGCGGTGACCC                  |

|                    |                                                 |
|--------------------|-------------------------------------------------|
| PiIN EV157-158AD R | GGGTCACCGCCTTGTCCGCGTTCAGGGTCGGGGCGG            |
| PiIN E157A F       | CGACCCTGAACGCGGTCAAGGCGGTG                      |
| PiIN E157A R       | CACCGCCTTGACCGCGTTCAGGGTCG                      |
| PiIN V158D F       | CGACCCTGAACGAGGATAAGGCGGTGACCCA                 |
| PiIN V158D R       | TGGGTCACCGCCTTATCCTCGTTCAGGGTCG                 |
| PiIN L81K F        | GCGAACTGAAGTCGCGGCCAGCAAAAGCTCGAGCGGATGAAGAT    |
| PiIN L81K R        | GATCTTCATCCGCTCGAGCTTTTGTGGCGCCGCGACTTCAGTTCGC  |
| PiIN L81A F        | CGCCAGCAATTGGCCGAGCGGATGAAG                     |
| PiIN L81A R        | CTTCATCCGCTCGGCCAATTGCTGGCG                     |
| PiIN L82K F        | GCGAACTGAAGTCGCGGCCAGCAATTGAAGGAGCGGATGAAGAT    |
| PiIN L82K R        | GATCTTCATCCGCTCCTTCAATTGCTGGCGCCGCGACTTCAGTTCGC |
| PiIN LD64-65KK F   | GCGCAAGGAAATCGTCGTAAAGAAGGCCCGGATCAAGGAAATCAGC  |
| PiIN LD64-65KK R   | CGCTGATTTCTTGATCCGGGCTTCTTTACGACGATTTCTTGCGC    |
| PiIN L64K F        | CGCAAGGAAATCGTCGTAAAAGACGCCCGGATCAAG            |
| PiIN L64K R        | CTTGATCCGGGCGTCTTTTACGACGATTTCTTGCG             |
| PiIN D65K F        | AAGGAAATCGTCGTAAGCCCGGATCAAGGAA                 |
| PiIN D65K R        | TTCCTTGATCCGGGCTTTGAGTACGACGATTTCTT             |
| PiIO M92A F        | GCCTACAAGGCACAGATGAAGGAGGCGGAAGAGTCCTTTGGCGCC   |
| PiIO M92A R        | GGCGCCAAAGGACTCTTCCGCCTCCTTCATCTGTGCCTTGTAGGC   |
| PiIO M92K F        | GCCTACAAGGCACAGATGAAGGAGAAGGAAGAGTCCTTTGGCGCC   |
| PiIO M92K R        | GGCGCCAAAGGACTCTTCTTCTCCTTCATCTGTGCCTTGTAGGC    |
| PiIM F             | TATATATATGTGCTAGGGCTCATAAAGAAG                  |
| PiIP R             | TATATATGGAATTCGTCAGGAGCGTTCCTTGAGAGTCAG         |

5

6

7

8

## SUPPLEMENTARY FIGURES AND LEGENDS

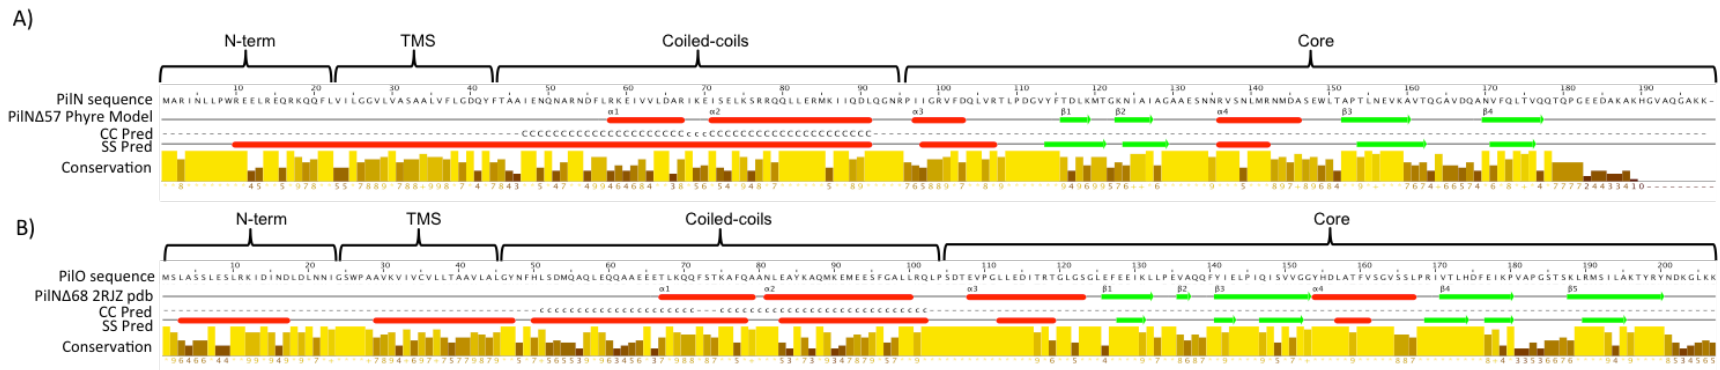

**Fig. S1. Amino acid sequences and secondary structures of PiIN and PiIO.** The sequence alignments for **(A)** PiIN and **(B)** PiIO are shown. The predicted cytoplasmic N-termini (N-term), the transmembrane segments (TMS), the coiled-coils (CC) and the core regions used in this study are indicated above with open brackets. Sequence conservation of the PiIN and PiIO families from a subset of Pseudomonads (*P. aeruginosa* PAK, *P. fulva* 12-X, *P. stutzeri* A1501, *P. syringae* pv. phaseolicola 1448A, & *P. protegens* CHA0) is indicated by the bars. High conservation of the residues is indicated by a high bar and a bright yellow color, whereas low conservation is displayed as a low bar and a dark brown color. The  $\alpha$ -helices (red rectangles) and  $\beta$ -strands (green arrows) present in the PiIO $\Delta$ 68 structure (PDB 2RJZ (9)), the PiIN $\Delta$ 57 Phyre<sup>2</sup> homology model, and in the secondary-structure predictions (SS pred) are shown. The predicted CC regions (CC pred) are indicated with “c”, with the size indicating the confidence of these predictions with “C” and “c” representing stronger and weaker predictions, respectively. The sequences were gathered from the Pseudomonas Genome Database (10) and this figure was prepared using Jalview 2.8.2 (11, 12).

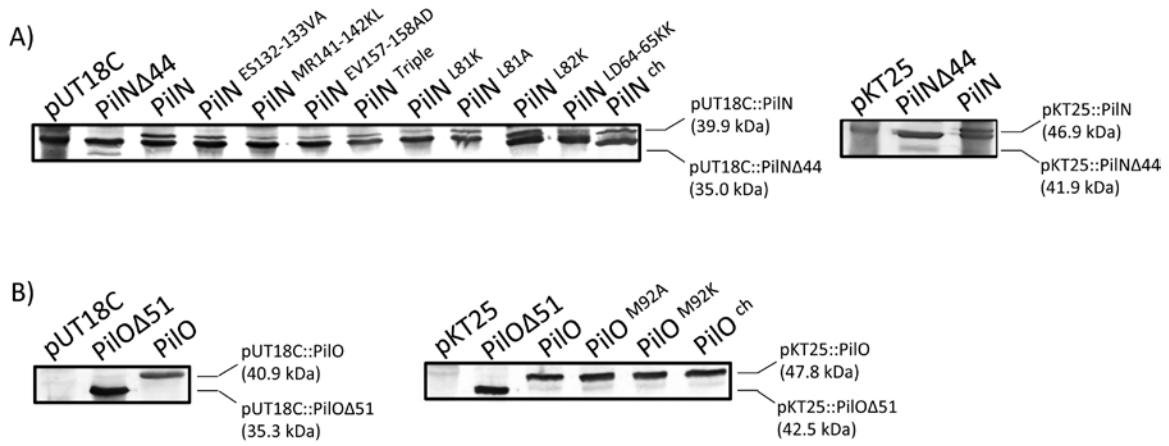

**Fig. S2. All BTH fusion constructs are stable.** Fusion constructs were tested for expression and stability via Western blotting using protein specific antisera for **(A)** PilN mutants and the PilN chimera (PilN ch), or **(B)** PilO mutants and the PilO chimera (PilO ch) in each vector.



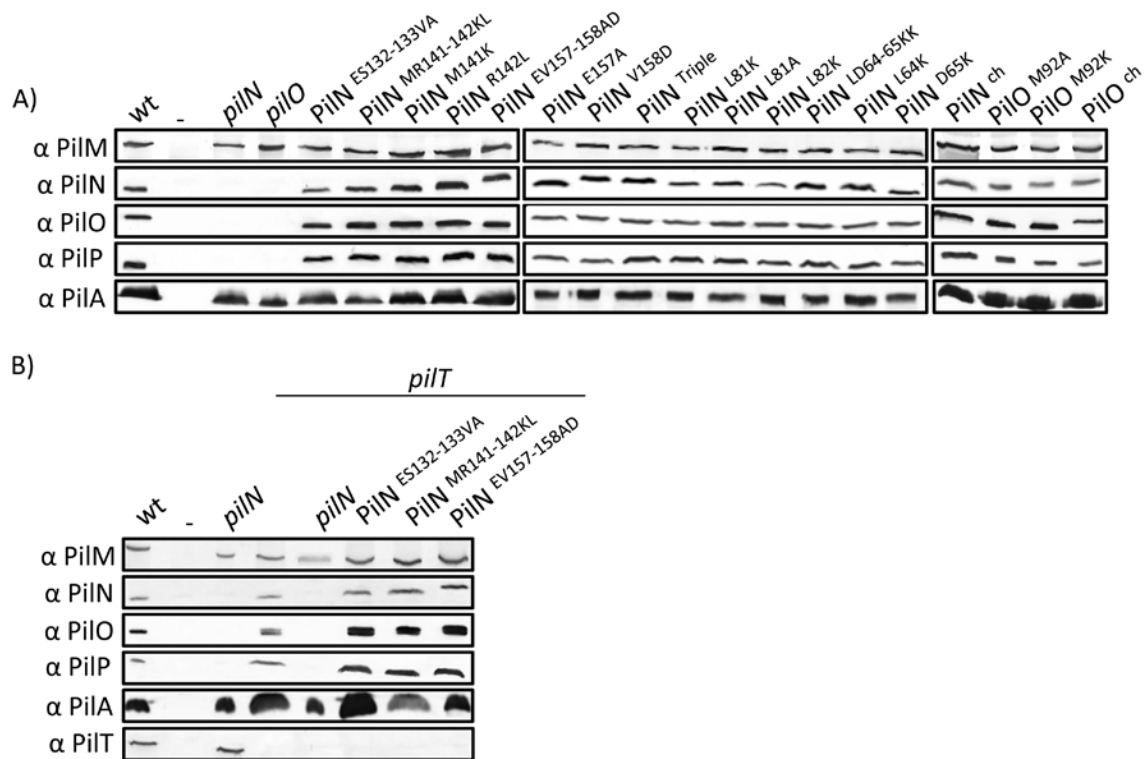

**Fig. S3. Intracellular levels of alignment subcomplex proteins and PiIa are unaffected by PiIN and PiIO chromosomal mutations. (A)** All PiIN and PiIO mutations were introduced into the chromosome of *P. aeruginosa* and PiIMNOPA proteins were tested for stability via Western blotting using protein specific antisera as designated on left. **(B)** PiIN mutants ES132-133VA, MR141-142KL, and EV157-158AD were created in a retraction deficient background (*pilT*) and tested for stability via Western blotting using protein specific antisera for PiIMNOPAT as designated on left.

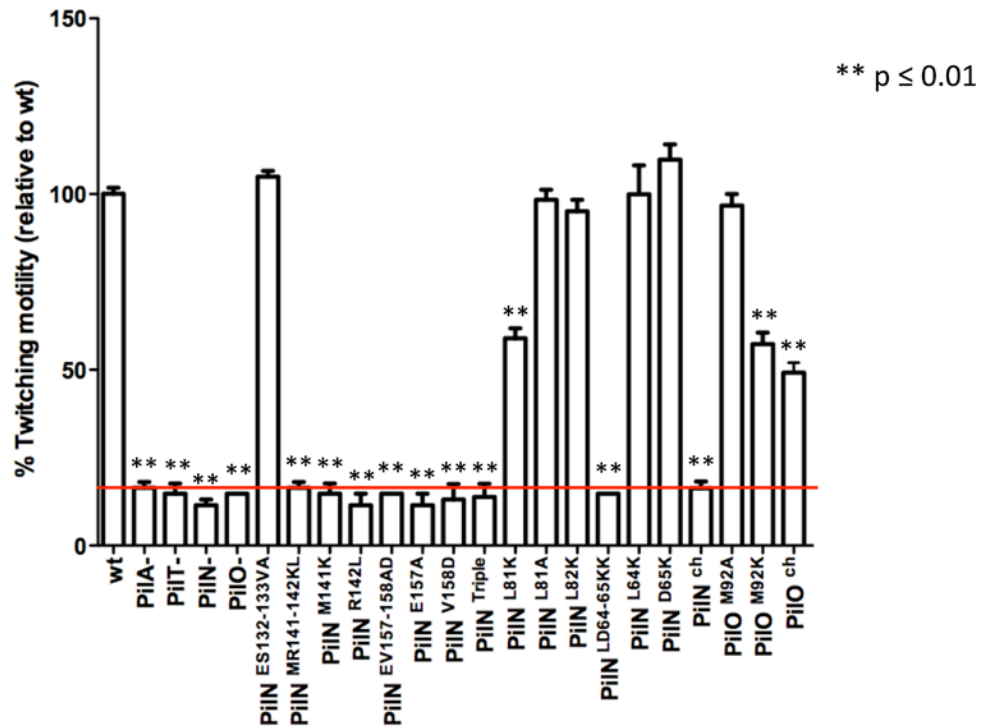

**Fig. S4. Twitching motility of PiIN and PiIO mutants compared to wild type.** Single colonies of each mutant were stab inoculated on a 1% LB agar plate and incubated for 36 h at 37 °C. The agar was removed and the plates were stained with a 1% crystal violet solution to visualize. Twitching motility zones were repeated in triplicate and measured using ImageJ software, and reported as the percent relative to wild-type (wt). Experiments were performed in triplicate (N=3). Bars represent the means  $\pm$  standard error. \*\*  $p \leq 0.01$ .

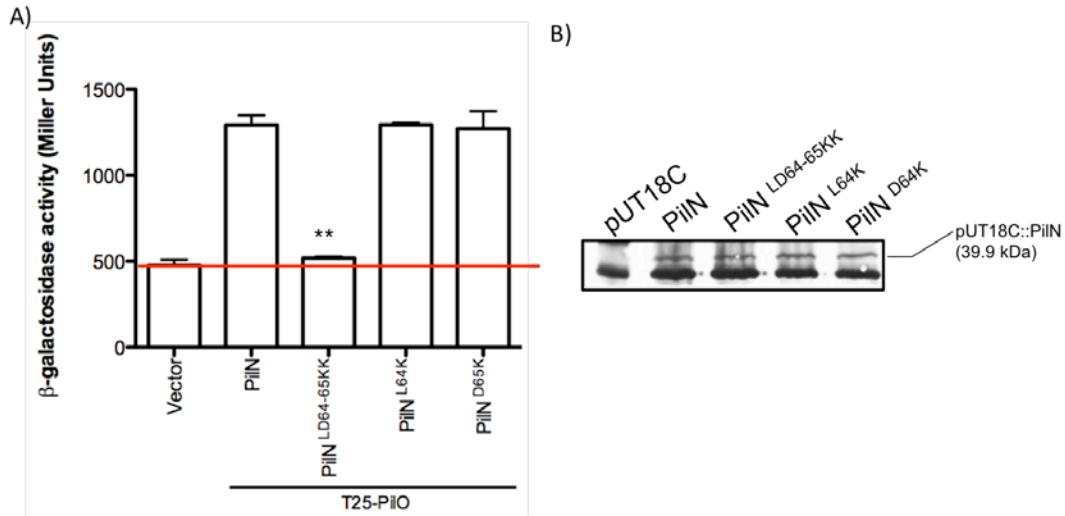

**Figure S5: Interactions of PiIN coiled-coiled L64 and point mutants with PiIO. (A)**

PiIN<sup>LD64-65KK</sup> single mutations (PiIN<sup>L64K</sup> and PiIN<sup>D65K</sup>) restore the interaction between PiIN and PiIO in the BTH assay, \*\*  $p \leq 0.01$  compared to PiINO positive control. **(B)** PiIN point mutants are expressed at the same level as the unmodified fusion protein as detected by WB using anti-PiIN antisera.

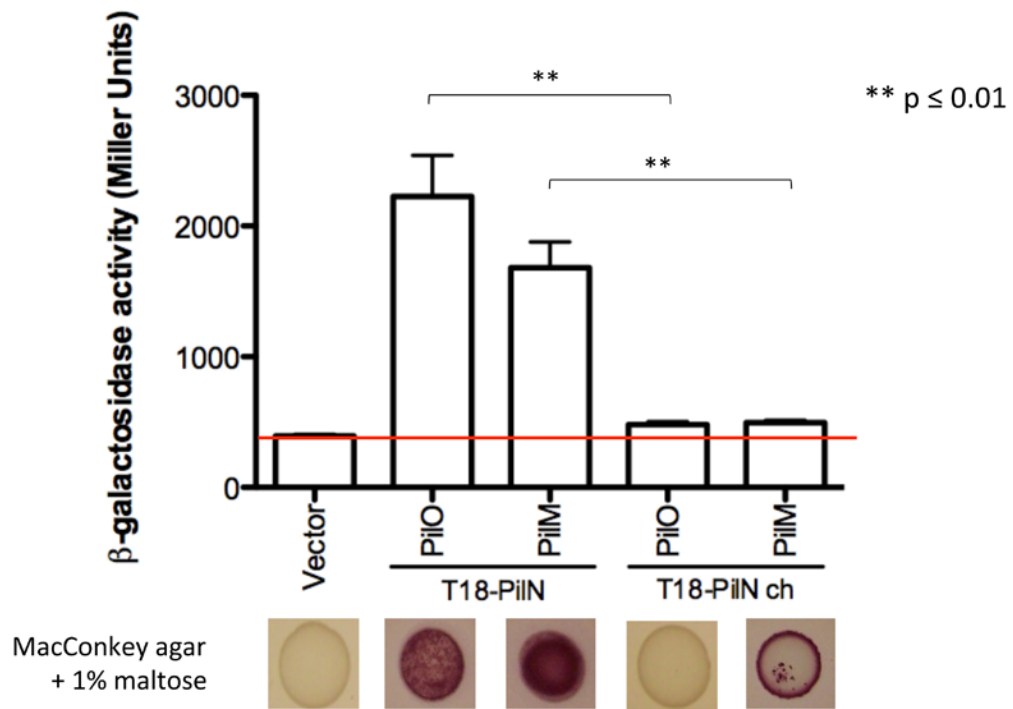

**Fig. S6. Interaction between PiIM and PiIN in the BTH system is altered when the TMS of PiIN is replaced with that of PiIO.** Full-length PiIN and PiIN chimera (PiIN ch) fused at the N termini to the T18 fragment, were tested for interaction with full-length PiIM and PiIO fused at the N termini to the T25 fragment of adenylate cyclase from *Bordetella pertussis* using the BTH assay. Experiments performed in triplicate (N=3). Bars represent the means  $\pm$  standard error. \*\*  $p \leq 0.01$ .

## References

1. **Simon R, Priefer, U., Pulher, A.** 1983. A broad host range mobilisation system for *in vivo* genetic engineering: transposon mutagenesis in Gram-negative bacteria. *Nat Biotech* **1**:784-791.
2. **Ayers M, Sampaleanu LM, Tammam S, Koo J, Harvey H, Howell PL, Burrows LL.** 2009. PilM/N/O/P proteins form an inner membrane complex that affects the stability of the *Pseudomonas aeruginosa* type IV pilus secretin. *J Mol Biol* **394**:128-142.
3. **Whitchurch CB, Hobbs M, Livingston SP, Krishnapillai V, Mattick JS.** 1991. Characterisation of a *Pseudomonas aeruginosa* twitching motility gene and evidence for a specialised protein export system widespread in eubacteria. *Gene* **101**:33-44.
4. **Takhar HK, Kemp K, Kim M, Howell PL, Burrows LL.** 2013. The platform protein is essential for type IV pilus biogenesis. *J Biol Chem* **288**:9721-9728.
5. **Kus JV, Kelly J, Tessier L, Harvey H, Cvitkovitch DG, Burrows LL.** 2008. Modification of *Pseudomonas aeruginosa* Pa5196 type IV Pilins at multiple sites with D-Araf by a novel GT-C family Arabinosyltransferase, TfpW. *J Bacteriol* **190**:7464-7478.
6. **Hoang TT, Karkhoff-Schweizer RR, Kutchma AJ, Schweizer HP.** 1998. A broad-host-range Flp-FRT recombination system for site-specific excision of chromosomally-located DNA sequences: application for isolation of unmarked *Pseudomonas aeruginosa* mutants. *Gene* **212**:77-86.
7. **Karimova G, Dautin N, Ladant D.** 2005. Interaction network among *Escherichia coli* membrane proteins involved in cell division as revealed by bacterial two-hybrid analysis. *J Bacteriol* **187**:2233-2243.

8. **Asikyan ML, Kus JV, Burrows LL.** 2008. Novel proteins that modulate type IV pilus retraction dynamics in *Pseudomonas aeruginosa*. *J Bacteriol* **190**:7022-7034.
9. **Sampaleanu LM, Bonanno JB, Ayers M, Koo J, Tammam S, Burley SK, Almo SC, Burrows LL, Howell PL.** 2009. Periplasmic domains of *Pseudomonas aeruginosa* PilN and PilO form a stable heterodimeric complex. *J Mol Biol* **394**:143-159.
10. **Winsor GL, Lam DK, Fleming L, Lo R, Whiteside MD, Yu NY, Hancock RE, Brinkman FS.** 2011. Pseudomonas Genome Database: improved comparative analysis and population genomics capability for Pseudomonas genomes. *Nucleic Acids Res* **39**:D596-600.
11. **Clamp M, Cuff J, Searle SM, Barton GJ.** 2004. The Jalview Java alignment editor. *Bioinformatics* **20**:426-427.
12. **Waterhouse AM, Procter JB, Martin DM, Clamp M, Barton GJ.** 2009. Jalview Version 2--a multiple sequence alignment editor and analysis workbench. *Bioinformatics* **25**:1189-1191.
